## The association between body mass index and Barrett's esophagus: a systematic review

David Seidel,<sup>1</sup> Weerasak Muangpaisan,<sup>2</sup> Hiroyuki Hiro,<sup>3</sup> Aju Mathew,<sup>1</sup> Georgios Lyratzopoulos<sup>1</sup>

<sup>1</sup>Department of Public Health and Primary Care, University of Cambridge, UK; <sup>2</sup>Faculty of Medicine, Siriraj Hospital, Mahidol University, Bangkok, Thailand; and <sup>3</sup>Health Policy Bureau, Ministry of Health, Labour and Welfare, Tokyo, Japan

**SUMMARY.** Biological plausibility and evidence from case series indicate that an increased body mass index could be a risk factor for Barrett's esophagus. The aim of this study was to assemble and appraise the available evidence on the association of body mass index and Barrett's esophagus in a narrative approach. A systematic literature review identified a nested case-control study and 10 case-control studies, with sample sizes of between 129 and 953. Overall, cases were on average older than controls, more often male and white, but did not differ with regards to body mass index. An increased body mass index ( $\geq 30$  and  $\geq 35$  kg/m<sup>2</sup>) was associated with greater risk of Barrett's esophagus in four studies (odds ratio range: 2.0–4.0). These studies, however, did not adjust for symptoms suggestive of gastroesophageal reflux disease. No significant association was reported in the other six studies. To conclude, the existing evidence on the association between body mass index and risk of Barrett's esophagus relates primarily to case-control studies and is inconsistent. Gastroesophageal reflux symptoms can be a potential confounder and further research should better address this issue. Evidence from cohort studies may help shed further light on this putative association, which is of relevance to public health and cancer control.

**KEY WORDS:** Barrett's esophagus, body mass index, gastroesophageal reflux disease.

### INTRODUCTION

Patients with gastroesophageal reflux disease (GERD) may develop Barrett's esophagus (BE), a premalignant condition that can lead to the development of esophageal adenocarcinoma (OAC).<sup>1</sup> BE is defined as columnar-lined epithelium that can be recognized at endoscopy and is confirmed to have specialized intestinal metaplasia (SIM) by biopsy.<sup>2,3</sup> Depending on the length of the epithelium, it is categorized as either long-segment (LSBE) ( $\geq 3$  cm) or short-segment (SSBE) ( $< 3$  cm).<sup>4</sup> Approximately 10%

of patients with frequent GERD symptoms develop BE.<sup>5</sup> Of these, 0.5–1.0% per year will be diagnosed with OAC.<sup>6</sup>

In Western populations, a rapid increase in OAC incidence has been observed since the 1970s.<sup>7,8</sup> OAC has an overall poor prognosis (5-year survival is 13%<sup>9</sup>) and only limited treatment options exist. There is evidence that BE prevalence may follow a similar (to OAC) increasing trend.<sup>10–13</sup> An estimated 1.6% of the adult general population have the condition,<sup>14</sup> most of which however will never be detected. Only one in every 20 patients undergoing resection of OAC has BE diagnosed before resection,<sup>15</sup> thus, missing the chance for early intervention.

Although the association between GERD and the risk of developing BE is well established,<sup>16–19</sup> other accepted risk factors include older age,<sup>20–22</sup> male sex,<sup>20–23</sup> and white race.<sup>22,24</sup> Evidence from case series<sup>19,25</sup> suggests that an increased body mass index (BMI) could also be a risk factor for BE. This is an

Address correspondence to: Mr David Seidel, MPhil, Department of Public Health and Primary Care, University Forvie Site, Robinson Way, Cambridge CB2 2SR, UK. E-mail: djs216@cam.ac.uk

Author contributions: D.S. conceived and designed the study, extracted and interpreted data, and drafted the manuscript; W.M., H.H., A.M., and G.L. contributed to data extraction or interpretation and commented on the draft manuscript.

important research question, as body weight could potentially be modified for preventive purposes. In order to investigate this association, relevant studies were systematically assembled and critically appraised.

## MATERIALS AND METHODS

### Search strategy

One reviewer searched the electronic database, PubMed, for articles published between 1950, when BE was first described,<sup>26</sup> and March 2008 (last updated in January 2009). Key indexing terms (MeSH) describing the condition ('Barrett esophagus') and the implicated risk factor ('body mass index,' 'body weight,' and 'obesity') were used to retrieve the articles.

### Identification of studies

Potentially relevant studies were identified based on inspection of the title and abstract. For those publications judged of potential relevance, using pre-stated eligibility criteria, a full-text copy was examined. References of identified studies were scanned to ensure that no studies were missed.

### Eligibility criteria

Inclusion was limited to peer-reviewed studies in English. Only those with histological confirmation of SIM were considered. Because of the expected low number of relevant studies, no restrictions were made in terms of study design. Studies were required to have a sample relating to the general population or a specially recruited control group, i.e. GERD, reflux esophagitis, or normal endoscopy controls.

### Extraction and analysis of information

One reviewer extracted data from the full-text publications once a decision was made to include the study. Data extraction was validated by a second reviewer. The methodological quality of the studies was assessed in a narrative approach, particularly focusing on study design, sample, and reported effect size.

## RESULTS

From more than 1000 initial hits, 18 studies were found to be investigating the association of BMI with BE (based on title and abstract), which were extracted and fully examined. Of these, eight met the eligibility criteria stated above. A recently conducted meta-analysis<sup>27</sup> of 10 studies provided unpublished

data for three studies that were initially excluded (due to a lack of adequate detail) but subsequently included, increasing the number of studies to 11. The meta-analysis itself was not considered in this review because it included two studies that did not meet the eligibility criteria (no histological confirmation of BE) and provided only pooled unadjusted risk estimates.

### Study designs

Table 1 contains some characteristics of the studies included. Aside from two more recent studies, all were published post-2004 – eight of which were conducted in the USA,<sup>29–34,36,38</sup> one in Australia,<sup>37</sup> one in Ireland,<sup>28</sup> and one in Sweden.<sup>35</sup> Ten were case-control studies,<sup>28–30,32–38</sup> and one was a nested case-control study.<sup>31</sup> Five studies compared BE cases with population controls free of the condition and with no history of OAC or other malignancies.<sup>28,31,32,35,37</sup> Two of these additionally recruited a second group consisting of GERD controls<sup>31</sup> and normal endoscopy controls.<sup>35</sup> The remaining studies compared BE cases with GERD controls,<sup>30,34,36</sup> normal endoscopy controls,<sup>38</sup> or both normal endoscopy and reflux esophagitis controls.<sup>29,33</sup>

Laboratory pathology reports, data from a health services organization, and endoscopy records were used to identify cases and controls. Population controls (matched by age, sex, and residential area) were drawn from general practices,<sup>28</sup> a health services organization,<sup>31</sup> population registries,<sup>32,37</sup> and hospital endoscopy services.<sup>35</sup> Four studies included only newly diagnosed BE cases,<sup>31,32,35,37</sup> one enrolled prevalent cases under endoscopic surveillance,<sup>29</sup> and six made no apparent distinction between incident and prevalent case status.<sup>28,30,33,34,36,38</sup> All except for one study<sup>28</sup> included both cases with SSBE and LSBE.

Data on weight and height were retrieved from patient records in three studies,<sup>29,33,38</sup> ascertained by the use of questionnaires in four studies,<sup>30,34,35,37</sup> and taken during interviews (either at the study participant's home or in the study setting) in four studies.<sup>28,31,32,36</sup> In addition to BMI at diagnosis, Anderson *et al.*<sup>28</sup> assessed BMI 5 years ago and at age 21. Most studies were conducted in hospital settings, generally at gastroenterology clinics. Two were set in Veterans Affairs Medical Centers.<sup>33,38</sup>

### Study participants

In total, the reviewed studies comprised 5080 participants (Table 2). Sample sizes ranged from 129 to 953. The lowest number of cases was 21 and the greatest was 320. Overall, cases were – on average – older than controls and more often male, but did not substantially differ with regards to mean BMI. Among the

**Table 1** Designs of the included studies (*n* = 11)

| Author(s)                             | Year | Country   | Study design                                                         | Setting                                          |                                                  |
|---------------------------------------|------|-----------|----------------------------------------------------------------------|--------------------------------------------------|--------------------------------------------------|
|                                       |      |           |                                                                      | Cases                                            | Controls                                         |
| Anderson <i>et al.</i> <sup>28</sup>  | 2007 | Ireland   | Population-based case-control study                                  | Laboratory pathology reports                     | General practices                                |
| Cameron <sup>29</sup>                 | 1999 | USA       | Case-control study with reflux esophagitis/normal endoscopy controls | Hospital gastroenterology division               | Hospital gastroenterology division               |
| Campos <i>et al.</i> <sup>30</sup>    | 2001 | USA       | Case-control study with GERD controls                                | University tertiary referral center              | University tertiary referral center              |
| Corley <i>et al.</i> <sup>31</sup>    | 2007 | USA       | Population-based nested case-control study with GERD controls        | Integrated health services delivery organization | Integrated health services delivery organization |
| Edelstein <i>et al.</i> <sup>32</sup> | 2007 | USA       | Population-based case-control study                                  | Community gastroenterology clinics               | Population registry                              |
| El-Serag <i>et al.</i> <sup>33</sup>  | 2005 | USA       | Case-control study with reflux esophagitis/normal endoscopy controls | Veterans Affairs Medical Center                  | Veterans Affairs Medical Center                  |
| Gerson <i>et al.</i> <sup>34</sup>    | 2007 | USA       | Case-control study with GERD controls                                | Hospital gastroenterology division               | Hospital gastroenterology division               |
| Johansson <i>et al.</i> <sup>35</sup> | 2007 | Sweden    | Population-based case-control study with normal endoscopy controls   | Hospital endoscopy services                      | Hospital endoscopy services                      |
| Shaheen <i>et al.</i> <sup>36</sup>   | 2005 | USA       | Case-control study with GERD controls                                | Gastroenterology clinic                          | Gastroenterology clinic                          |
| Smith <i>et al.</i> <sup>37</sup>     | 2005 | Australia | Population-based case-control study                                  | Two private and one public pathology laboratory  | Population registry                              |
| Stein <i>et al.</i> <sup>38</sup>     | 2005 | USA       | Case-control study with normal endoscopy controls                    | Veterans Affairs Medical Center                  | Veterans Affairs Medical Center                  |

GERD, gastroesophageal reflux disease.

four studies that reported information about ethnic group,<sup>31–34</sup> there were slightly more white participants among cases compared with controls.

Six studies reported on participation rates.<sup>28,31,32,35,37,38</sup> Comparatively high proportions of eligible cases and controls (between 69% and 93%) participated in three studies.<sup>32,37,38</sup> By contrast, less than 50% of cases and less than 40% of controls participated in the study by Corley *et al.*<sup>31</sup> Participation was slightly higher with the difference between cases and controls being less pronounced in another study.<sup>35</sup> Anderson *et al.*<sup>28</sup> interviewed four out of five eligible cases, but only two out of five eligible controls.

### Effect sizes

Key findings are summarized in Table 3. No effect size was reported in one study<sup>34</sup> for which gender-specific odds ratios (OR) and 95% confidence intervals (CI) were calculated (based on the information provided in the publication). A statistically significant positive association was observed in four studies,<sup>31–33,38</sup> although the remaining six studies found no significant association.<sup>28–30,34–37</sup> None of the studies with significant results adjusted for GERD symptoms.

Corley *et al.*<sup>31</sup> adjusted for age, sex, ethnicity, and smoking and found that individuals with a BMI of  $\geq 35$  had an increased odds of BE (OR = 2.0, 95% CI: 1.1–3.7) as compared with the reference group (GERD controls with a BMI <25). A BMI of  $\geq 30$  was associated with a 2.6-fold increase in BE risk when compared with population controls in a study by Edelstein *et al.*<sup>32</sup> Stein *et al.*<sup>38</sup> obtained a comparable effect size associated with both a BMI of 25–30 (OR = 2.4) and >30 (OR = 2.5). Participants with a BMI of >30 in the study by El-Serag *et al.*<sup>33</sup> were at a fourfold increased risk with each additional unit of BMI, increasing the risk by 12%. This effect was similar after controlling for subcutaneous adipose tissue; however, it was attenuated and became non-significant after controlling for visceral adipose tissue.

### DISCUSSION

A nested case-control study and 10 case-control studies were eligible for this review. No further studies, in particular no cohort studies, were identified. The results are inconsistent with some studies indicating that a BMI of  $\geq 30$  ('obese') and  $\geq 35$  ('morbid obesity') is associated with an increased BE risk (regardless of control group type), although others failed to detect such an association.

A major threat to the validity of case-control studies stems from the potential lack of representa-

**Table 2** Study samples by age, sex, race, and BMI ( $n = 11$ )

| Author(s)                               | Study sample |          | Age (mean) |          | Male (%) |          | White (%) |          | BMI (mean) |          |
|-----------------------------------------|--------------|----------|------------|----------|----------|----------|-----------|----------|------------|----------|
|                                         | Cases        | Controls | Cases      | Controls | Cases    | Controls | Cases     | Controls | Cases      | Controls |
| Anderson <i>et al.</i> <sup>28</sup>    | 224          | 260      | 62.4       | 63.0     | 82.6     | 84.6     | —         | —        | 27         | 27       |
| Cameron <sup>29†</sup>                  | 64           | 103      | 68.3       | 59.0     | 79.7     | 55.3     | —         | —        | —          | —        |
| Campos <i>et al.</i> <sup>30†</sup>     | 174          | 328      | 52         | 52       | 78.7     | 62.8     | —         | —        | 27.2       | 26.9     |
| Corley <i>et al.</i> <sup>31‡</sup>     | 320          | 317      | —          | —        | 73.1     | 67.5     | 86.6      | 84.5     | 29.5       | 29.5     |
|                                         |              | 316§     |            |          |          | 69.0§    |           | 80.1§    |            | 28.9§    |
| Edelstein <i>et al.</i> <sup>32††</sup> | 193          | 211      | —          | —        | 61.1     | 63.0     | 89.1      | 91.0     | —          | —        |
| El-Serag <i>et al.</i> <sup>33</sup>    | 36           | 93       | 64         | 63.0     | 100      | 96.8     | 83.3      | 66.7     | 27         | 24       |
| Gerson <i>et al.</i> <sup>34</sup>      | 165          | 586      | 58.5       | 54.5     | 90.3     | 68.9     | 80.0      | 73.4     | 28.0       | 27.8     |
| Johansson <i>et al.</i> <sup>35</sup>   | 21           | 160      | 60.3       | 61.8     | 28.6     | 33.8     | —         | —        | 26.5       | 25.7     |
|                                         |              | 498††    |            | 51.4††   |          | 43.0††   |           |          |            | 25.2††   |
| Shaheen <i>et al.</i> <sup>36†</sup>    | 62           | 121      | 55.9       | 49.1     | 76       | 48       | —         | —        | 27.8       | 27.9     |
| Smith <i>et al.</i> <sup>37</sup>       | 117          | 261      | 56         | 63       | 64.1     | 65.9     | —         | —        | —          | —        |
| Stein <i>et al.</i> <sup>38</sup>       | 65           | 385      | 61.1       | 59.9     | 100      | 100      | 90.8      | 82.0     | 29.8       | 28.0     |

†Data are presented as obtained from the original publication, but may differ from unpublished data used in the meta-analysis by Cook *et al.*<sup>27</sup> ‡Most cases (59.7%) and controls (64.0% of population controls and 59.2% of GERD controls) were in the age stratum 60–79 years. §GERD controls (versus population controls). ††Most cases (31.1%) were in the age stratum 60–80 years and most controls (30.3%) in the age stratum 50–59 years. †††Normal endoscopy controls (versus population controls). BMI, body mass index; GERD, gastroesophageal reflux disease.

tiveness of both cases and controls. Many individuals with BE are asymptomatic<sup>39</sup> and therefore unlikely to be referred for endoscopy. Thus, selected cases might have only been representative of a subsection of all BE cases in the population – those with a more symptomatic presentation. Similarly, if obese individuals were underrepresented among the cases because they are less likely to undergo endoscopy, then this could have attenuated a potential association between BMI and BE. Lastly, observed associations would have been artificially diminished if selected controls had a higher BMI than those eligible but not selected. Nested case-control studies are less susceptible to these biases, because cases are drawn from the same known population as controls to which they are compared. In this respect, nested case-control studies have better validity. However, only one of the reviewed studies used a nested-case control design. Only six studies reported on participation rates, two of which evaluated nonparticipation bias. The low participation in some of the studies might have introduced selection bias. Corley *et al.*<sup>31</sup> and Johansson *et al.*<sup>35</sup> conducted subsequent analyses without finding any marked difference between participating and nonparticipating subjects. Finally, studies conducted in specific settings, such as Veterans Affairs Medical Centers, may have included unrepresentative cases.

The present evidence base has certain limitations. A major drawback of case-control studies is that they provide weak evidence about the temporal association between exposure and outcome. Considering that individuals who develop BE may be 40 years of age<sup>40</sup> and those diagnosed with the condition may be 60 years of age and over,<sup>12</sup> more than 20 years could pass between the initiation and manifestation of BE. Only one of the reviewed studies<sup>28</sup> attempted to

address this lead time by collecting information on self-reported BMI at age 21, which was found to be associated with an increased but nonsignificant BE risk. Yet, study participants were – on average – 63 years old and the potential for recall bias was high. This problem could be obviated by examining the association in the context of established cohort studies with long-term follow-up. It is also acknowledged that case-control studies with a small number of cases relative to controls may lack statistical power. Yet, independent of such considerations, it was decided to include all studies that met the eligibility criteria as we focused on methodological aspects.

The use of incident cases in case-control studies is preferable to the use of prevalent cases. Recruiting cases right after they are diagnosed minimizes recall bias and potential problems that could result from knowledge of ‘case status’ among prevalent patients; being diagnosed with BE might cause change of behavior and influence risk factor profiles. The accuracy of the exposure measurement is subject to interviewer bias in studies that used interviews to assess BMI. Blinding interviewers, like in the study by Corley *et al.*,<sup>31</sup> generally provides some protection against measurement error. Perhaps, because BE itself is not a life-threatening condition, it is rather unlikely that the interviewer’s knowledge of the case status could have induced bias in significant ways. Nevertheless, the reliability of BMI as an obesity indicator is imperfect because variations in body proportions are not accounted for. Evidence suggested that visceral adipose tissue confounded the association between BMI and BE; this was also true for waist circumference in the study by Corley *et al.*,<sup>31</sup> but not for waist-to-hip ratio in the study by Edelstein *et al.*<sup>32</sup> Indicators of body fat accumulation merit further

**Table 3** Effect sizes and model adjustments ( $n = 11$ )

| Author(s)                             | Data format (BMI)   | Effect size               |                | Model adjustment                                      |
|---------------------------------------|---------------------|---------------------------|----------------|-------------------------------------------------------|
|                                       |                     | BMI                       | OR (95% CI)    |                                                       |
| Anderson <i>et al.</i> <sup>28</sup>  | Ordinal             | Current                   |                | Age                                                   |
|                                       |                     | <25.8                     | 1.0            | Sex                                                   |
|                                       |                     | 25.8–29.0                 | 0.6 (0.4–1.0)  | Smoking status (never/ex/ current)                    |
|                                       |                     | >29.0                     | 0.8 (0.4–1.3)  | Alcohol intake (grams per week)                       |
|                                       |                     | 5 years ago               |                | Education (years full-time)                           |
|                                       |                     | <25.0                     | 1.0            | Job type (manual/non manual)                          |
|                                       |                     | 25.0–28.1                 | 0.8 (0.5–1.4)  | GERD symptoms (ever/never)                            |
|                                       |                     | >28.1                     | 0.9 (0.5–1.4)  |                                                       |
|                                       |                     | Age 21                    |                |                                                       |
|                                       |                     | <22.1                     | 1.0            |                                                       |
| Cameron <sup>29</sup>                 | Continuous          | 22.1–24.1                 | 1.2 (0.7–2.0)  |                                                       |
|                                       |                     | >24.1                     | 1.0 (0.6–1.8)  |                                                       |
|                                       |                     | Male                      |                | Sex                                                   |
| Campos <i>et al.</i> <sup>30</sup>    | Continuous          | Per 1 kg/m <sup>2</sup>   | 1.0 (0.9–1.1)  |                                                       |
|                                       |                     | Female                    |                |                                                       |
|                                       |                     | Per 1 kg/m <sup>2</sup>   | 1.0 (0.9–1.1)  |                                                       |
| Corley <i>et al.</i> <sup>31</sup>    | Ordinal, continuous | Male                      | 1.0 (1.0–1.1)  | Sex                                                   |
|                                       |                     | Female                    |                |                                                       |
|                                       |                     | Per 1 kg/m <sup>2</sup>   | 1.1 (1.0–1.2)  |                                                       |
|                                       |                     | Population controls       |                | Age                                                   |
|                                       |                     | <25.0                     | 1.0            | Sex                                                   |
|                                       | Ordinal, continuous | 25.0–27.4                 | 1.2 (0.7–1.9)  | Ethnicity                                             |
|                                       |                     | 27.5–29.9                 | 1.2 (0.7–2.0)  | Smoking                                               |
|                                       |                     | 30.0–34.9                 | 1.1 (0.7–1.7)  |                                                       |
|                                       |                     | ≥35.0                     | 1.3 (0.7–2.1)  |                                                       |
|                                       |                     | Per 1 kg/m <sup>2</sup>   | 1.0 (1.0–1.0)  |                                                       |
| Edelstein <i>et al.</i> <sup>32</sup> | Ordinal             | GERD controls             |                | Age                                                   |
|                                       |                     | <25.0                     | 1.0            | Sex                                                   |
|                                       |                     | 25.0–27.4                 | 1.2 (0.1–2.0)  | Ethnicity                                             |
|                                       |                     | 27.5–29.9                 | 0.8 (0.5–1.3)  | Smoking                                               |
|                                       |                     | 30.0–34.9                 | 1.1 (0.7–1.7)  |                                                       |
|                                       | Ordinal             | ≥35.0                     | 2.0 (1.1–3.7)  |                                                       |
|                                       |                     | Per 1 kg/m <sup>2</sup>   | 1.0 (1.0–1.1)  |                                                       |
|                                       |                     | <25.0                     | 1.0            | Age (categorical)                                     |
|                                       |                     | 25.0–29.9                 | 1.6 (0.9–2.8)  | Sex                                                   |
|                                       |                     | ≥30.0                     | 2.6 (1.5–4.4)  | Cigarette use (ever/never)                            |
| El-Serag <i>et al.</i> <sup>33</sup>  | Ordinal, continuous | <25.0                     | 1.0            | –                                                     |
|                                       |                     | 25.0–30.0                 | 1.7 (0.7–4.2)  |                                                       |
|                                       |                     | >30.0                     | 4.0 (1.4–11.1) |                                                       |
|                                       |                     | Per 1 kg/m <sup>2</sup>   | 1.1 (1.0–1.2)  |                                                       |
|                                       |                     | Per 1 kg/m <sup>2</sup>   | 1.1 (1.0–1.3)  |                                                       |
|                                       | Continuous          | Per 1 kg/m <sup>2</sup>   | 1.0 (0.9–1.2)  | Subcutaneous adipose tissue                           |
|                                       |                     | Male                      |                | Visceral adipose tissue                               |
|                                       |                     | <18.5                     | 1.0            | Sex                                                   |
|                                       |                     | 18.5–24.9                 | 1.4 (0.1–14.7) |                                                       |
|                                       |                     | 25.0–29.9                 | 0.8 (0.1–7.1)  |                                                       |
| Gerson <i>et al.</i> <sup>34</sup>    | Ordinal             | ≥30.0                     | 0.7 (0.1–10.8) |                                                       |
|                                       |                     | Female                    |                |                                                       |
|                                       |                     | <18.5                     | 1.0            |                                                       |
|                                       |                     | 18.5–24.9                 | 1.1 (0.4–2.7)  |                                                       |
|                                       |                     | 25.0–29.9                 | 0.8 (0.3–1.8)  |                                                       |
|                                       | Ordinal             | ≥30.0                     | 0.9 (0.4–2.2)  |                                                       |
|                                       |                     | Population controls       |                | Age (continuous)                                      |
|                                       |                     | <23.6                     | 1.0            | Sex                                                   |
|                                       |                     | 23.6–26.6                 | 1.9 (0.5–7.4)  | Reflux symptoms (yes/no)                              |
|                                       |                     | >26.6                     | 1.2 (0.3–4.5)  | <i>Helicobacter pylori</i> infection (present/absent) |
| Johansson <i>et al.</i> <sup>35</sup> | Ordinal             | Normal endoscopy controls |                | Smoking (ever/never)                                  |
|                                       |                     | <23.6                     | 1.0            | Alcohol consumption (user/abstainer)                  |
|                                       |                     | 23.6–26.6                 | 0.9 (0.3–2.9)  |                                                       |
|                                       |                     | >26.6                     | 1.1 (0.3–3.3)  |                                                       |
|                                       | Continuous          | Male                      |                | Sex                                                   |
|                                       |                     | Per 1 kg/m <sup>2</sup>   | 1.0 (0.9–1.1)  |                                                       |
|                                       |                     | Female                    |                |                                                       |
|                                       |                     | Per 1 kg/m <sup>2</sup>   | 0.9 (0.9–1.0)  |                                                       |
|                                       |                     | Maximum                   |                |                                                       |
| Smith <i>et al.</i> <sup>37</sup>     | Ordinal             | 18.5–24.9                 | 1.0            | Age                                                   |
|                                       |                     | 25.0–29.9                 | 1.0 (0.5–1.7)  | Sex                                                   |
|                                       |                     | ≥30.0                     | 1.7 (0.9–3.2)  | Age                                                   |
|                                       |                     | Maximum                   |                | Sex                                                   |
|                                       |                     | 18.5–24.9                 | 1.0            | Frequency of GERD symptoms                            |
|                                       | Ordinal             | 25.0–29.9                 | 0.9 (0.5–1.8)  | BMI (continuous)                                      |
|                                       |                     | ≥30.0                     | 1.5 (0.7–3.1)  | Pack-years smoked (continuous)                        |
|                                       |                     | <25.0                     | 1.0            | NSAID use                                             |
|                                       |                     | 25.0–30.0                 | 2.4 (1.1–5.3)  | Age (categorical)                                     |
|                                       |                     | >30.0                     | 2.5 (1.1–5.4)  | Race (white/non-white)                                |

BMI, body mass index; CI, confidence interval; GERD, gastroesophageal reflux disease; NSAID, nonsteroidal anti-inflammatory drug; OR, odds ratio.



investigation as they may be associated with the condition.

The potential for misclassification of the outcome was small. Only studies with histological confirmation of SIM were included. However, it is possible that cases in at least some of the studies could have had metaplastic changes of the junctional/stomach cardia epithelium, and not of the esophagus per se, either because such cases may not have been excluded by design or because of potential (endoscopic biopsy) sampling error. Three of the studies specifically excluded such cases from the BE case definition.<sup>34,37,38</sup> The exploration of the association between obesity and metaplasia of the gastroesophageal junction/stomach cardia by further studies will be useful. It is unlikely that endoscopy controls were misclassified, but population controls could have been sampled together with undiagnosed cases from the general population. This would have made cases and controls more alike and biased the findings towards null. However, the potential residual error is small given the rareness of the condition. Of greater concern is the use of the ICD-9 code 530.2 ('ulcer of esophagus') in studies using routine data to identify cases and non-cases, as this code can also be used for conditions other than BE. A recent investigation into its validity<sup>41</sup> found that the positive predictive value for BE diagnosis was less than 50%. To what extent this could have led to misclassification is difficult to interpret. Only Corley *et al.*<sup>31</sup> explicitly use this method of case identification. However, records were additionally reviewed by a physician, which limits the potential for bias.

Studies in support of the association of a high BMI and an increased BE risk were adjusted for a maximum of four variables, including age, sex, and race. None of the 'positive' studies, however, adjusted for GERD symptoms – probably the most important risk factor for BE and a potential confounder. A meta-analysis<sup>42</sup> has shown that a BMI of >30 is associated with a twofold increased risk of GERD symptoms. Findings from Smith *et al.*<sup>37</sup> suggested that the BE risk associated with a BMI of  $\geq 30$  is still increased (OR = 1.5) but no longer significant (95% CI: 0.7–3.1) after adjustment for GERD symptoms. It may be that the aforementioned significant estimates could have been attenuated or lost significance if GERD symptoms had been taken into account.

To conclude, the evidence from one nested case-control study and three case-controls studies was suggestive of a significant positive association between high levels of BMI and risk of BE. Other case-control studies did not report a significant association. The evidence is constrained by the fact that GERD symptoms were not adjusted for in the statistical analyses. This lack of adjustment, however, does not invalidate the potential public health importance of a positive

association between BMI and BE. It is plausible that obesity contributes to the risk of BE through increasing the risk of GERD. Further research should aim to address this question through analysis of cohort study datasets. Quantitative synthesis of the relevant studies may be of help, although the small number of relevant studies and the apparent heterogeneity in methodologies employed limits its value.

## Acknowledgments

D.S. is supported by the Medical Research Council, UK; W.M. is supported by the Cambridge Overseas Trust, UK; H.H. is supported by the Ministry of Health, Labour and Welfare, Japan; A.M. is supported by the Cambridge Commonwealth Trust, UK. The authors have no conflicts of interest to declare.

## References

- 1 Reid B J, Weinstein W M, Lewin K J *et al.* Endoscopic biopsy can detect high-grade dysplasia or early adenocarcinoma in Barrett's esophagus without grossly recognizable neoplastic lesions. *Gastroenterology* 1988; 94: 81–90.
- 2 Shalauta M D, Saad R. Barrett's esophagus. *Am Fam Physician* 2004; 69: 2113–8.
- 3 Sampliner R E. Updated guidelines for the diagnosis, surveillance, and therapy of Barrett's esophagus. *Am J Gastroenterol* 2002; 97: 1888–95.
- 4 Spechler S J. Clinical practice: Barrett's esophagus. *N Engl J Med* 2002; 346: 836–42.
- 5 Mann N S, Tsai M F, Nair P K. Barrett's esophagus in patients with symptomatic reflux esophagitis. *Am J Gastroenterol* 1989; 84: 1494–6.
- 6 Shaheen N J, Crosby M A, Bozyski E M, Sandler R S. Is there publication bias in the reporting of cancer risk in Barrett's esophagus? *Gastroenterology* 2000; 119: 333–8.
- 7 Brown L M, Devesa S S. Epidemiologic trends in esophageal and gastric cancer in the United States. *Surg Oncol Clin N Am* 2002; 2: 235–56.
- 8 Powell J, McConkey C. The rising trend in oesophageal adenocarcinoma and gastric cardia. *Eur J Cancer Prev* 1992; 1: 265–9.
- 9 Eloubeidi M A, Mason A C, Desmond R A, El-Serag H B. Temporal trends (1973–1997) in survival of patients with esophageal adenocarcinoma in the United States: a glimmer of hope? *Am J Gastroenterol* 2003; 98: 1627–33.
- 10 Bardhan K D, Royston C, Willemse P J *et al.* Barrett's oesophagus (BO), an increasing hazard? The view from a UK district general hospital (DGH). *Gut* 2002; 50: A123.
- 11 Caygill C P, Reed P I, Johnston B J, Hill M J, Ali M H, Levi S. A single centre's 20 years' experience of columnar-lined (Barrett's) oesophagus diagnosis. *Eur J Gastroenterol Hepatol* 1999; 11: 1355–8.
- 12 Caygill C P J, Watson A, Lao-Sirieix P, Fitzgerald R C. Barrett's oesophagus and adenocarcinoma. *World J Surg Oncol* 2004; 2: 12.
- 13 Watson A, Reed P I, Caygill C P J, Epstein O, Winslet M C, Pounder R E. Changing incidence of columnar-lined (Barrett's) oesophagus (CLO) in the UK. *Gastroenterology* 1999; 116: 351.
- 14 Ronkainen J, Aro P, Storskrubb T *et al.* Prevalence of Barrett's esophagus in the general population: an endoscopic study. *Gastroenterology* 2005; 129: 1825–31.
- 15 Dulai G S, Guha S, Kahn K L, Gornbein J, Weinstein W M. Preoperative prevalence of Barrett's esophagus in esophageal adenocarcinoma: a systematic review. *Gastroenterology* 2002; 122: 26–33.
- 16 Csendes A, Smok G, Quiroz J *et al.* Clinical, endoscopic, and functional studies in 408 patients with Barrett's oesophagus,

- compared to 174 cases of intestinal metaplasia of the cardia. *Am J Gastroenterol* 2002; 97: 554–60.
- 17 Eisen G M, Sandler R S, Murray S, Gottfried M. The relationship between gastroesophageal reflux disease and its complications with Barrett's esophagus. *Am J Gastroenterol* 1997; 92: 27–31.
  - 18 Lieberman D A, Oehlke M, Helfand M. Risk factors for Barrett's esophagus in community-based practice. GORGE consortium. *Gastroenterology Outcomes Research Group in endoscopy. Am J Gastroenterol* 1997; 92: 1293–7.
  - 19 Westhoff B, Brotze S, Weston A *et al*. The frequency of Barrett's esophagus in high-risk patients with chronic GERD. *Gastrointest Endosc* 2005; 61: 226–31.
  - 20 Van Blankenstein M, Looman C W N, Johnston B J, Caygill C P J. Age and sex distribution of the prevalence of Barrett's esophagus found in a primary referral endoscopy center. *Am J Gastroenterol* 2005; 100: 568–76.
  - 21 Van Soest E M, Siersema P D, Dieleman J P, Sturkenboom M C, Kuipers E J. Age and sex distribution of the incidence of Barrett's esophagus found in a Dutch primary care population. *Am J Gastroenterol* 2005; 100: 2599–600.
  - 22 Sampliner R E. Practice guidelines on the diagnosis, surveillance, and therapy of Barrett's esophagus. The Practice Parameters Committee of the American College of Gastroenterology. *Am J Gastroenterol* 1998; 93: 1028–32.
  - 23 Cook M B, Wild C P, Forman D. A systematic review and meta-analysis of the sex ratio for Barrett's esophagus, erosive reflux disease, and nonerosive reflux disease. *Am J Epidemiol* 2005; 162: 1050–61.
  - 24 Abrams J A, Fields S, Lightdale C J, Neugut A I. Racial and ethnic disparities in the prevalence of Barrett's esophagus among patients who undergo upper endoscopy. *Clin Gastroenterol Hepatol* 2008; 6: 30–4.
  - 25 Caygill C P, Johnston D A, Lopez M *et al*. Lifestyle factors and Barrett's esophagus. *Am J Gastroenterol* 2002; 97: 1328–31.
  - 26 Barrett N R. Chronic peptic ulcer of the oesophagus and oesophagitis. *Br J Surg* 1950; 38: 175–82.
  - 27 Cook M B, Greenwood D C, Hardie L J, Wild C P, Forman D. A systematic review and meta-analysis of the risk of increasing adiposity on Barrett's esophagus. *Am J Gastroenterol* 2008; 103: 292–300.
  - 28 Anderson L A, Watson R G, Murphy S J *et al*. Risk factors for Barrett's oesophagus and oesophageal adenocarcinoma: results from the FINBAR study. *World J Gastroenterol* 2007; 13: 1585–94.
  - 29 Cameron A J. Barrett's esophagus: prevalence and size of hiatal hernia. *Am J Gastroenterol* 1999; 94: 2054–9.
  - 30 Campos G M R, DeMeester S R, Peters J H *et al*. Predictive factors of Barrett esophagus. *Arch Surg* 2001; 136: 1267–73.
  - 31 Corley D A, Kubo A, Levin T R *et al*. Abdominal obesity and body mass index as risk factors for Barrett's esophagus. *Gastroenterology* 2007; 133: 34–41.
  - 32 Edelstein Z R, Farrow D C, Bronner M P, Rosen S N, Vaughan T L. Central adiposity and risk of Barrett's esophagus. *Gastroenterology* 2007; 133: 403–11.
  - 33 El-Serag H B, Kvavil P, Hacken-Bitar J, Kramer J R. Abdominal obesity and the risk of Barrett's esophagus. *Am J Gastroenterol* 2005; 100: 2151–6.
  - 34 Gerson L B, Ullah N, Fass R, Green C, Shetler K, Singh G. Does body mass index differ between patients with Barrett's oesophagus and patients with chronic gastro-oesophageal reflux disease? *Aliment Pharmacol Ther* 2007; 25: 1079–86.
  - 35 Johansson J, Hakansson H O, Mellblom L, Kempas A, Johansson K E, Granath F. Risk factors for Barrett's oesophagus: a population-based approach. *Scand J Gastroenterol* 2007; 42: 148–56.
  - 36 Shaheen N J, Mitchell K J, Spacek M, Davis P, Galanko J A, Sandler R S. Body fat distribution predicts the presence of Barrett's esophagus: a case-control study. *Gastroenterology* 2005; 128: A231.
  - 37 Smith K J, O'Brien S M, Smithers B M *et al*. Interactions among smoking, obesity, and symptoms of acid reflux in Barrett's esophagus. *Cancer Epidemiol Biomarkers Prev* 2005; 14: 2481–6.
  - 38 Stein D J, El-Serag H B, Kuczyński J, Kramer J R, Sampliner R E. The association of body mass index with Barrett's oesophagus. *Aliment Pharmacol Ther* 2005; 22: 1005–10.
  - 39 Gerson L B, Shetler K, Triadafilopoulos G. Prevalence of Barrett's esophagus in asymptomatic individuals. *Gastroenterology* 2002; 123: 461–7.
  - 40 Cameron A J, Lomboy C T. Barrett's esophagus: age, prevalence, and extent of columnar epithelium. *Gastroenterology* 1992; 103: 1241–5.
  - 41 Jacobson B C, Gerson L B. The inaccuracy of ICD-9-CM code 530.2 for identifying patients with Barrett's esophagus. *Dis Esophagus* 2007; DOI:10.1111/j.1442-2050.2007.00800.x.
  - 42 Hampel H, Abraham N S, El-Serag H B. Meta-analysis: obesity and the risk for gastroesophageal reflux disease and its complications. *Ann Intern Med* 2005; 143: 199–211.
